SUMMER 2024 | VOLUME 22 | NUMBER 3

# Focus

The Journal of Lifelong Learning in Psychiatry

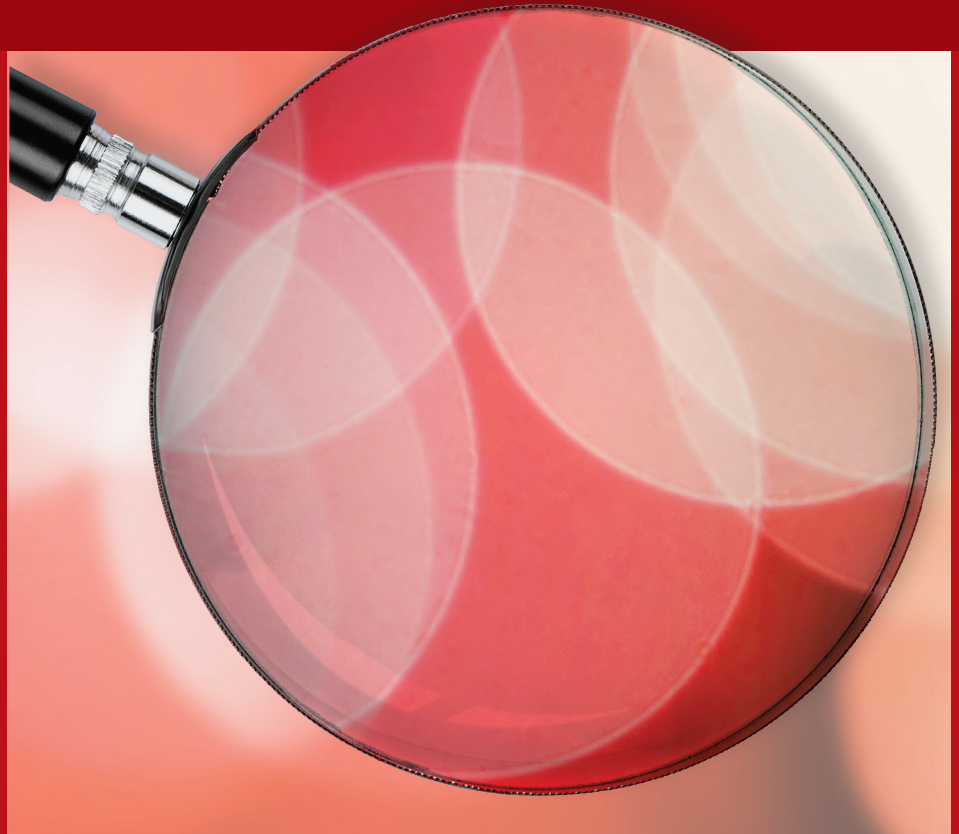

## Eating Disorders: Updates and Innovations

Guest Editor: Jennifer L. Dernenne, M.D.

AMERICAN  
PSYCHIATRIC  
ASSOCIATION 

[focus.psychiatryonline.org](http://focus.psychiatryonline.org)
