## APA Publishing

Simone Taylor, Ph.D.

*Publisher*

Michael D. Roy

*Editorial Director, Journals*

Demarie S. Jackson

*Managing Editor, Journals*

Wendy Lieberman Taylor

*Production Manager, Journals*

Peyton D. Fultz

*Editorial Manager, Focus*

*Focus* (ISSN 1541-4094) is published quarterly by the American Psychiatric Association, 800 Maine Ave. S.W., Suite 900, Washington, D.C. 20024. Printed in U.S.A. Periodicals postage paid at Washington, D.C., and additional mailing offices. POSTMASTER: Send all address changes to *Focus*, Circulation Department, American Psychiatric Association Publishing, 800 Maine Ave. S.W., Suite 900, Washington, D.C. 20024.

## Subscriptions

U.S. APA member \$446, U.S. non-member \$695. For additional subscription options, including international and student rates, contact Customer Service at (202) 559-3900 or (800) 368-5777.

## Officers of the Association

Ramaswamy Viswanathan, M.D.,

*Dr.Med.Sc.*

*President*

Theresa Miskimen, M.D.

*President-Elect*

Marketa Wills, M.D., M.B.A.

*Chief Executive Officer and Medical Director*

## Editorial Offices

Telephone: (202) 559-3719

Email: [focus@psych.org](mailto:focus@psych.org)

Journal Web site: [focus.psychiatryonline.org](http://focus.psychiatryonline.org)

## Change of Address and Assistance With Subscriptions

Contact Customer Service at (202) 559-3900 or (800) 368-5777 or e-mail [appi@psych.org](mailto:appi@psych.org).

## CME

Email: [focus@psych.org](mailto:focus@psych.org)

## Online Access

Call (800) 368-5777 or e-mail [appi@psych.org](mailto:appi@psych.org) for assistance with online access to *Focus* and CME activities.

## APA Learning Center

[education.psychiatry.org](http://education.psychiatry.org)

Copyright © 2024, American Psychiatric Association

## Editor

Mark Hyman Rapaport, M.D.

*Salt Lake City, Utah*

## Applied Armamentarium

Boadie Dunlop, M.D.

*Atlanta, Georgia*

## Communication Commentary

Dorothy E. Stubbe, M.D.

*New Haven, Connecticut*

## Ethics Commentary

Jacob M. Appel, M.D., J.D.

*New York, New York*

James L. Knoll IV, M.D.

*Syracuse, New York*

## Senior Advisory Board

Carol A. Bernstein, M.D.

*New York, New York*

Kathleen T. Brady, M.D., Ph.D.

*Charleston, South Carolina*

Peter F. Buckley, M.D.

*Memphis, Tennessee*

Glen O. Gabbard, M.D.

*Houston, Texas*

Ira M. Lesser, M.D.

*Torrance, California*

Joel Yager, M.D.

*Denver, Colorado*

## Editorial Board

Richard Balon, M.D.

*Rochester Hills, Michigan*

Joseph A. Cheong, M.D.

*Nashville, Tennessee*

Asmara T. Hoo-Cardiel, D.O.

*Denver, Colorado*

Paresh Atu Jaini, D.O.

*Dallas, Texas*

Raymond Lam, M.D., F.R.C.P.C.

*Vancouver, Canada*

Sherrell T. Lam, MD, F.A.C.P.

*Bethesda, Maryland*

Avram H. Mack, M.D.

*Wilmington, Delaware*

Vishal Madaan, M.D., M.B.B.S.

*Charlottesville, Virginia*

David Mischoulon, M.D., Ph.D.

*Boston, Massachusetts*

Francisco A. Moreno, M.D.

*Tucson, Arizona*

Philip R. Muskin, M.D.

*New York, New York*

Michele T. Pato, M.D., M.P.H.

*Brooklyn, New York*

Jeffrey Rakofsky, M.D.

*Atlanta, Georgia*

Victor I. Reus, M.D.

*San Francisco, California*

James W. Thompson, M.D., M.P.H.

*Palm Beach, Florida*

Marcia L. Verduin, M.D.

*Orlando, Florida*

Sidney Zisook, M.D.

*San Diego, California*

## Focus Self-Assessment

### Editorial Board

Paul J. Carlson, M.D.

*Salt Lake City, Utah*

Vikas Gupta, M.D.

*Winchester, Massachusetts*

Asmara T. Hoo-Cardiel, D.O.

*Denver, Colorado*

Paresh Atu Jaini, D.O.

*Dallas, Texas*

Venkata Kolli, M.B.B.S.

*Columbus, Nebraska*

Lorena Reyna, M.D.

*Alton, Texas*

Yi-lang Tang, M.D., Ph.D.

*Decatur, Georgia*

John Teshima, M.D., M.Ed.

*Toronto, Canada*

## Editor Emerita

Deborah J. Hales, M.D.

*Washington, D.C.*
